# Supplementary material for: MCT4 Promotes Tumor Malignancy in F98 Glioma Cells
Source: Hindawi journal article supplement (doi:10.1155/2021/6655529), 2021-04-14
Supplement: f1 [file 6655529.f1.zip]

| Primer      | Sequence 5'→3'          |
|-------------|-------------------------|
| Fw-hMCT4    | GGCGGAACCAACCCTCCTG     |
| Rv-hMCT4    | AGCAGTAGTGACCGAAGAGG    |
| Fw-mrMCT4   | GGTGAAACCAGCCCTCCTG     |
| Rv-mrMCT4   | AGTAGTAGTGCCCGAAGAGG    |
| Fw-hmrGAPDH | GCCAAGGTCATCCATGACAAC   |
| Rv-hmrGAPDH | TTCTGACACCTACCGGGGAG    |
| Fw-rVEGFR2  | TGGTCCTTGCCTCAGAAGAG    |
| Rv-rVEGFR2  | CCTTCCGAGGTTGGTCTGGT    |
| Fw-rVEGFA   | GCACATAGGAGAGATGAGCTTCC |
| Rv-rVEGFA   | CACCGCCTTGGCTTGTCACAT   |
