# Supplementary material for: MCT4 Promotes Tumor Malignancy in F98 Glioma Cells
Source: Hindawi journal article supplement (doi:10.1155/2021/6655529), 2021-04-14
Supplement: f1 [file 6655529.f1.zip]

| siRNA      | Sequence 5'→3'                                                       |
|------------|----------------------------------------------------------------------|
| Fw-siRNA#1 | GATCCCCCGTCAGTGTCTTCTTCAATTCAAGAGAT<br>TGAAGAAGACACTGACGGTTTTTGAAA   |
| Fw-siRNA#2 | GATCCCCCGACCCACGTCTACATGTATTCAAGAGAT<br>ACATGTAGACGTGGGTCGTTTTTGAAA  |
| Fw-siRNA#3 | GATCCCCCGGCAACGCTTGCTATTTATTCAAGAGAT<br>AAATAGCAAGCGTTGCCGTTTTTGAAA  |
| Rv-siRNA#1 | AGCTTTTCCAAAAACCGTCAGTGTCTTCTTCAATCTC<br>TTGAATTGAAGAAGACACTGACGGGGG |
| Rv-siRNA#2 | AGCTTTTCCAAAAACGACCCACGTCTACATGTATCTC<br>TTGAATACATGTAGACGTGGGTCGGGG |
| Rv-siRNA#3 | AGCTTTTCCAAAAACGGCAACGCTTGCTATTTATCTC<br>TTGAATAAATAGCAAGCGTTGCCGGGG |
