# Supplementary material for: MCT4 Promotes Tumor Malignancy in F98 Glioma Cells
Source: Hindawi journal article supplement (doi:10.1155/2021/6655529), 2021-04-14
Supplement: f1 [file 6655529.f1.zip]

| Antibody/Dye                                | Source                                                                 | Dilution |
|---------------------------------------------|------------------------------------------------------------------------|----------|
| Polyclonal rabbit-anti-laminin              | Sigma-Aldrich, Taufkirchen,<br>Germany (L9393)                         | 1:250    |
| Polyclonal rabbit-anti-MCT4                 | Santa Cruz Biotechnology,<br>Heidelberg, Germany (sc50329)             | 1:200    |
| Polyclonal Alexa-Fluor-568-goat-anti-rabbit | Molecular Probes, Life<br>Technologies, Darmstadt,<br>Germany (A11011) | 1:1 000  |
| Alexa-Fluor-568-Phalloidin                  | Molecular Probes, Life<br>Technologies, Darmstadt,<br>Germany (A12380) | 1:60     |
| 7-Aminoactinomycin (7-AAD)                  | Molecular Probes, Life<br>Technologies, Darmstadt,<br>Germany (A1310)  | 1:1 000  |
| Propidium iodide (PI)                       | Molecular Probes, Life<br>Technologies, Darmstadt,<br>Germany (P3566)  | 1 µg/ml  |
