# Supplementary figures and images for: MCT4 Promotes Tumor Malignancy in F98 Glioma Cells
Source: Hindawi journal article supplement (doi:10.1155/2021/6655529), 2021-04-14

A

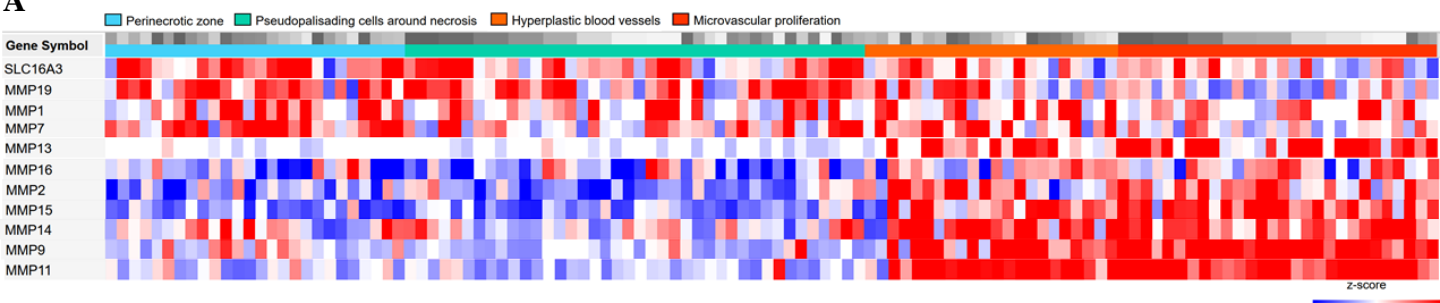

B

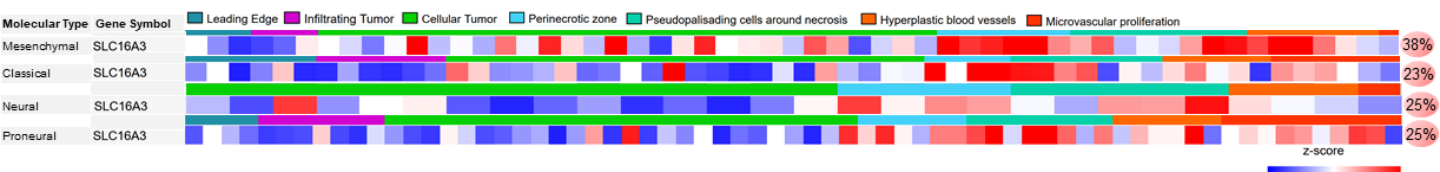

C

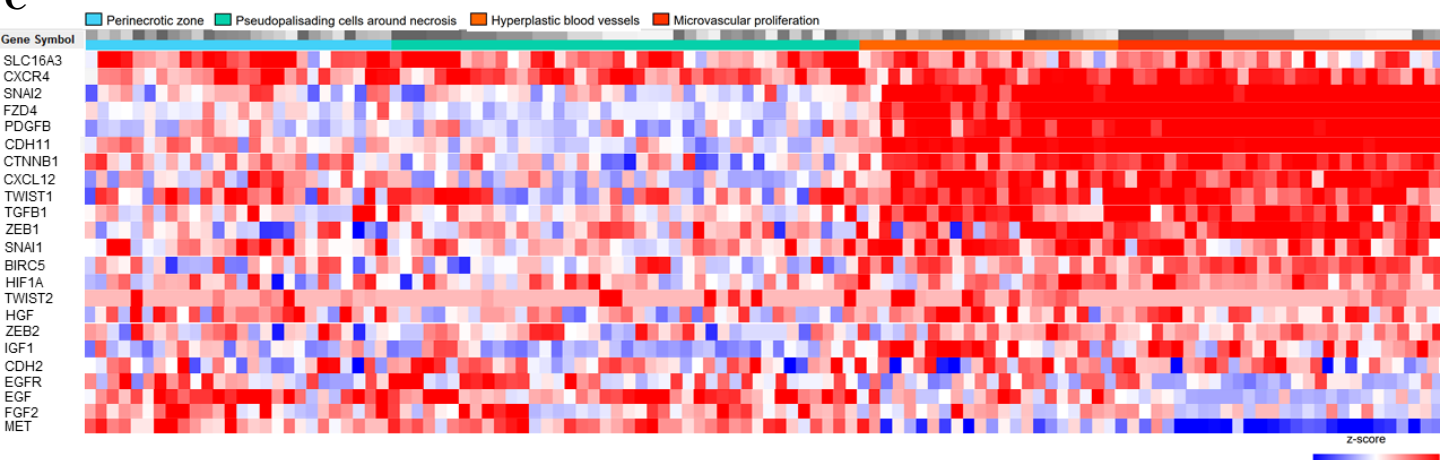

Supplement: f1 [file 6655529.f1.zip]

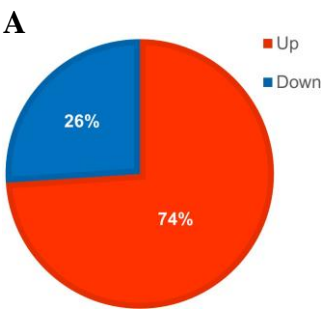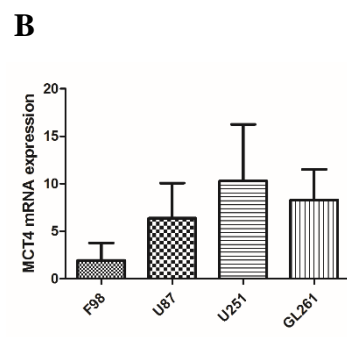

Supplement: f1 [file 6655529.f1.zip]

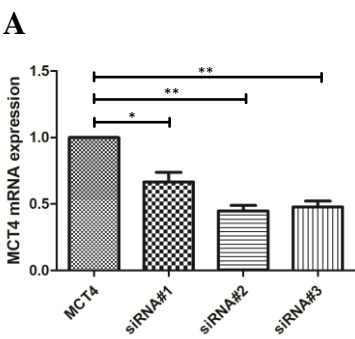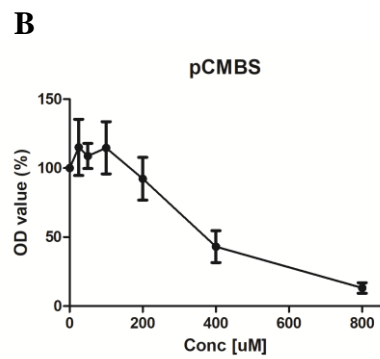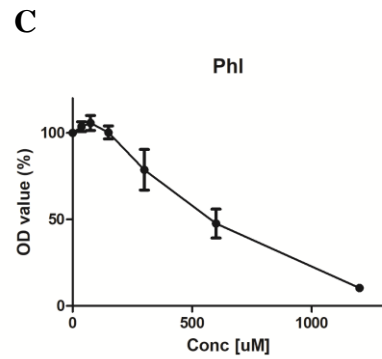

Supplement: f1 [file 6655529.f1.zip]

A

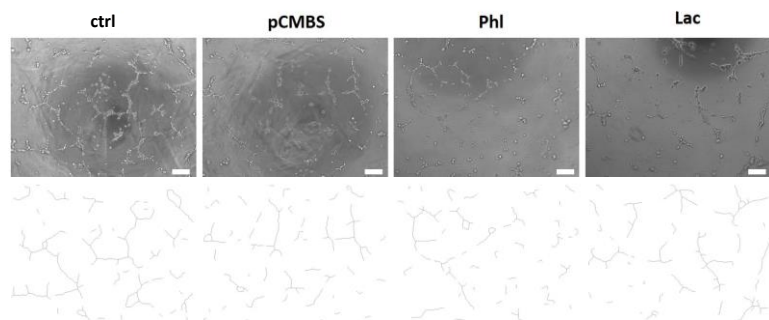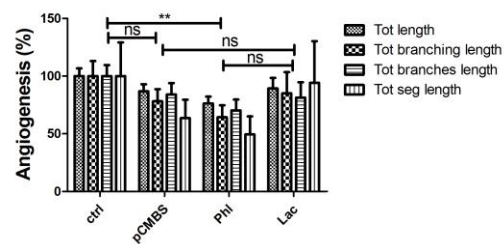

B

48h

PI

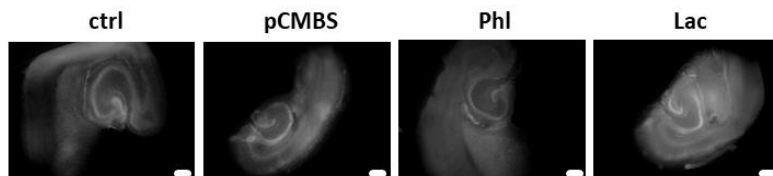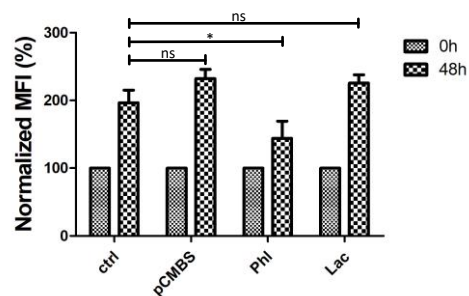

C

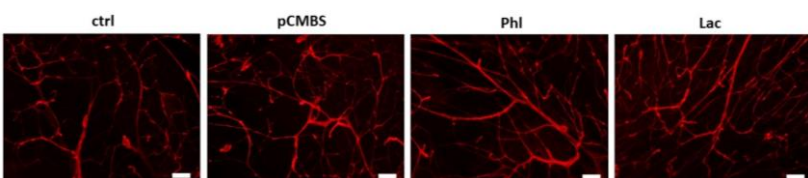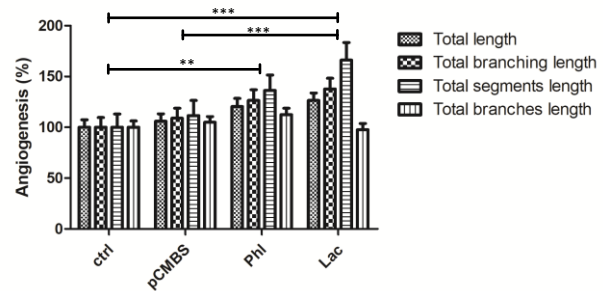

Supplement: f1 [file 6655529.f1.zip]

**A**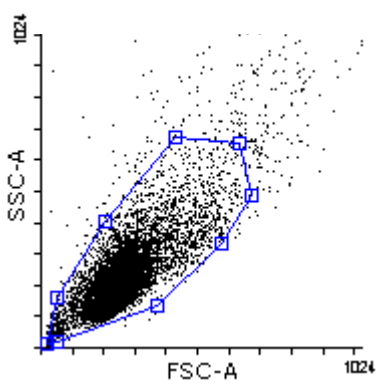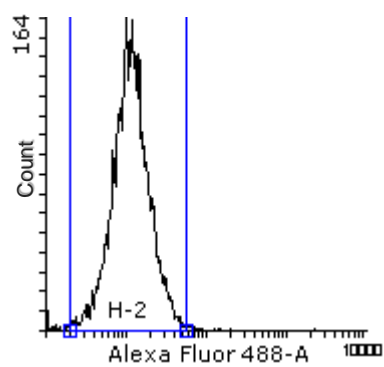**B**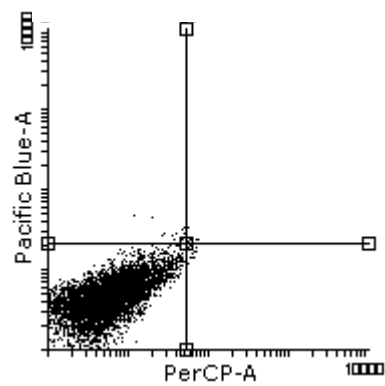

Supplement: f1 [file 6655529.f1.zip]
